# Supplementary material
Source: publisher figshare collection journal article supplement (https://tandf.figshare.com/ndownloader/files/14173307)
Supplement: Supplementary file 1 [file 14173307]

**Supplementary Table 1. Validation of the outcome (incidence of urinary bladder cancer) by checking the procedural codes around the index time. The outcomes of approximately 81 % of patients with urinary bladder cancer in this study could be validated using this method.**

| **57.49** Other transurethral excision or destruction of lesion or tissue of bladder/Endoscopic resection of bladder lesion;  **57.33** Closed [transurethral] biopsy of bladder  **57.7** Total cystectomy;  **57.6** Partial cystectomy;  **57.71** Radical cystectomy;  **60** Operations on prostate and seminal vesicles;  **57.32** Other cystoscopy;  **57.31** Cystoscopy through artificial stoma; and  **96.49** instillation of medication into the urinary tract.  **40.3** Regional lymph node excision  **90.7** Microscopic examination of specimen from lymph node and of lymph  **40.50** Radical excision of lymph nodes, not otherwise specified  **40.23** Excision of axillary lymph node  **40.24** Excision of inguinal lymph node  **40.52** Radical excision of peri-aortic lymph nodes  **40.53** Radical excision of iliac lymph nodes  **56.33** Closed endoscopic biopsy of the ureter  **33.27** Closed endoscopic biopsy of lung  **88.95** Magnetic resonance imaging of pelvis, prostate, and bladder  **55.0** Nephrotomy and nephrostomy | | |
| --- | --- | --- |
| For each patient diagnosed with UBC, the frequency of the above-listed procedural code(s) was checked. | | |
| **Validate period: 3 years pre- and post- index date.**   | Study group | Ever coded | Cancer | | --- | --- | --- | | N (%) | | Total | 0 | 84 (19.4) | | 1 | 131 (30.2) | | 2 | 91 (21.0) | | ≧3 | 128 (29.5) | | Non-hypertension | 0 | 47 (25.3) | | 1 | 60 (32.3) | | 2 | 44 (23.7) | | ≧3 | 35 (18.8) | | Hypertension | 0 | 37 (14.9) | | 1 | 71 (28.6) | | 2 | 47 (19.0) | | ≧3 | 93 (37.5) | | **Validate period: 4 years pre- and post- index date**   | Study group | Ever coded | Cancer | | --- | --- | --- | | N (%) | | Total | 0 | 82 (18.9) | | 1 | 129 (29.7) | | 2 | 92 (21.2) | | ≧3 | 131 (30.2) | | Non-hypertension | 0 | 46 (24.7) | | 1 | 60 (32.3) | | 2 | 43 (23.1) | | ≧3 | 37 (19.9) | | Hypertension | 0 | 36 (14.5) | | 1 | 69 (27.8) | | 2 | 49 (19.8) | | ≧3 | 94 (37.9) | | **Validate period: 5 years pre- and post- index date**   | Study group | Ever coded | Cancer | | --- | --- | --- | | N (%) | | Total | 0 | 81 (18.7) | |  | 1 | 128 (29.5) | |  | 2 | 92 (21.2) | |  | ≧3 | 133 (30.6) | | Non-hypertension | 0 | 45 (24.2) | |  | 1 | 60 (32.3) | |  | 2 | 43 (23.1) | |  | ≧3 | 38 (20.4) | | Hypertension | 0 | 36 (14.5) | |  | 1 | 68 (27.4) | |  | 2 | 49 (19.8) | |  | ≧3 | 95 (38.3) | |

When the procedure codes listed the Table were checked 3 years pre- and post-index date (the day when urinary bladder cancer was confirmed) in each patient with an outcome (cancer), nearly 80.7% (30.2 % + 21 % + 29.5%) of cancer could be validated. While the validation period was extended to 5 years pre- and post-index date, the validation rate increased to 81.3 %.
